# Supplementary material for: A genetic polymorphism affects the risk and prognosis of renal cell carcinoma: association with follistatin-like protein 1 expression
Source: PubMed Central journal article supplement (PMC4880907; doi:10.1038/srep26689), 2016-05-26
Supplement: srep26689-s1.pdf [file srep26689-s1.pdf]

## Supplementary materials

### A genetic polymorphism affects the risk and prognosis of renal cell carcinoma: association with follistatin-like protein 1 expression

Yan Liu, Xue Han, Yongwei Yu, Yibo Ding, Chong Ni, Wenbin Liu, Xiaomei Hou, Zixiong Li, Jianguo Hou, Dan Shen, Jianhua Yin, Hongwei Zhang, Timothy C. Thompson, Xiaojie Tan, & Guangwen Cao

Supplementary Figure 1.

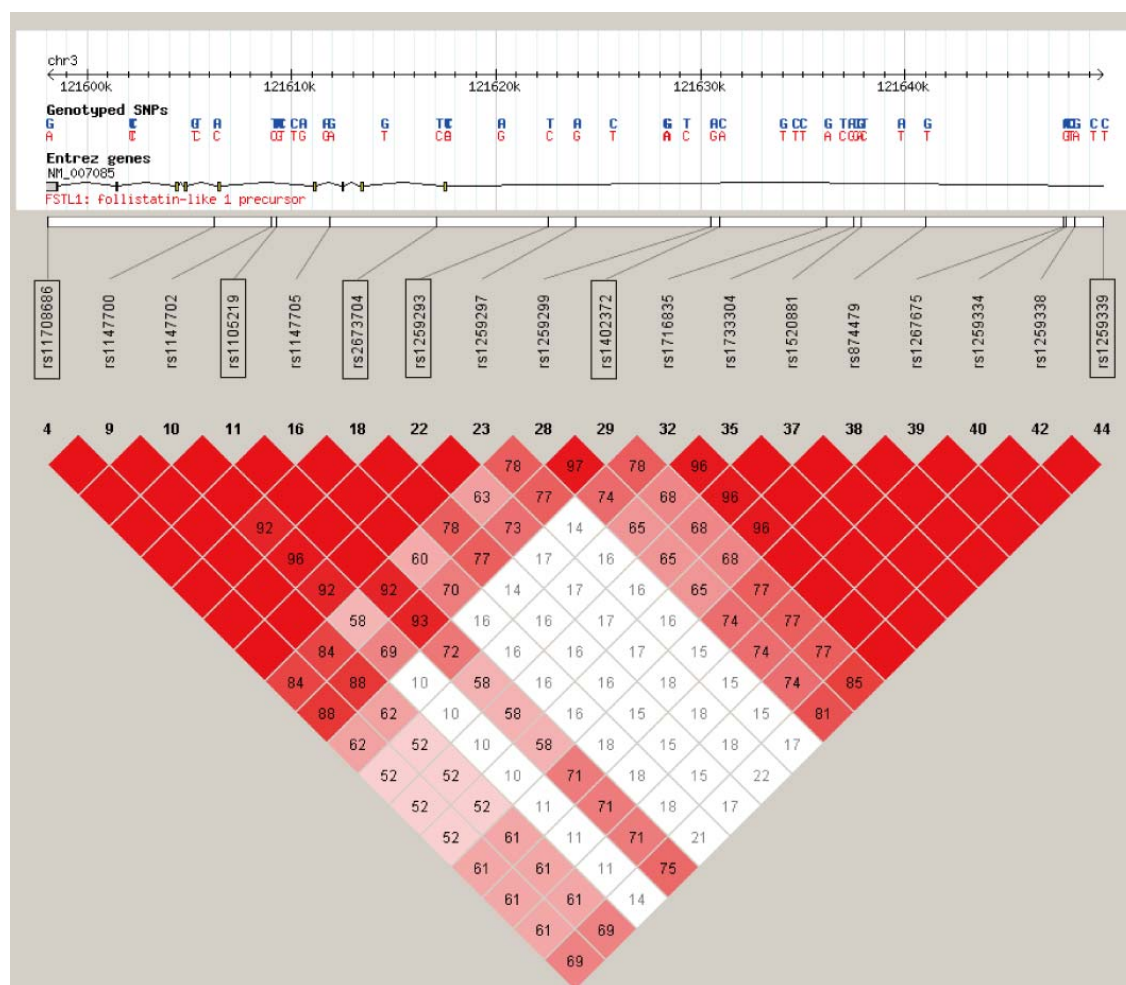

**Supplementary Figure 1. Haploview linkage disequilibrium plot and identification of haplotype block in the follistatin-like protein 1 (FSTL1) gene.**

The positions of the SNPs within exons, introns, and 3'-untranslated region of FSTL1 gene are shown above the plot. Pairwise linkage disequilibrium (LD) coefficients  $D' \times 100$ , indicating extent of LD between SNPs, are shown in each square ( $D'$  values of 1.0 are not shown). A standard Haploview color scheme was applied for the LD color display. Higher color intensity of the squares indicates higher LD between SNPs. The inverted black triangle represents a single haplotype block.

**Supplementary Table 1. Primers and probes for selected SNP genotyping.**

| <b>Polymorphisms</b> | <b>Primer sequences (5'-3')</b>                                             | <b>Probe sequences (5'-3')</b>                                                |
|----------------------|-----------------------------------------------------------------------------|-------------------------------------------------------------------------------|
| rs11708686           | Forward: GGTCTGTCATGCTGACGGC<br>Reverse: CGGAGGAGAGGTTTGGGAA                | FAM-AAGAGGCTGGAAGCAGAGAgCGTTCC-BHQ<br>HEX-AAGAGGCTGGAAGCAGAGAAaCGTTC-BHQ      |
| rs2673704            | Forward: ATCTTCCCCCATAACCCTTC<br>Reverse:AGCATATAAACCCCTATGCTTATAGTAACATAGA | FAM-CCAGCGTTAACAATTTGgTACATGTTCCA-BHQ<br>HEX-CCAGCGTTAACAATTTGaTACATGTTCC-BHQ |
| rs1259293            | Forward: GCAAGCAAATGGAGAAGCAAG<br>Reverse: CAGAGACTCAGATGCACGATCAC          | FAM-TTGCAAAACcACCAGTAG-MGB<br>HEX-TTTGCAAAACtACCAGTAGA-MGB                    |
| rs1259339            | Forward: AATTGAGGCTTCTTGGTGCTTT<br>Reverse:TTTACTACAGAGGCTCTGGCTTCTT        | FAM-CTTTTCTGCaACCAT-MGB<br>HEX-TTTTCTGCgACCATAA-MGB                           |
| rs1105219            | Forward: CAGCATGTAAGACTCTGATAATCATCAA<br>Reverse:AAATCCCCTCTTCCCAGACACT     | FAM-TGTTTTCTCCTGTTAGaCA-MGB<br>HEX-CTGTTAGgCACTGCC-MGB                        |
| rs1402372            | Forward:AAACCTTTTAAACAGACACACTTGGA<br>Reverse: CCACAAATTTTCCCATCCCATA       | FAM-AACAGGcCTAAACTG-MGB<br>HEX-AACAGGaCTAAACTGT-MGB                           |

Abbreviation:FSTL1=follistatin-like 1; SNP=single-nucleotide polymorphism; FAM=6-carboxyfluorescein; HEX=6-hexachloro-fluorescein; BHQ=Black Hole Quencher ; MGB=minor groove binder.
